# Supplementary material for: Rescue of behavioral and electrophysiological phenotypes in a Pitt-Hopkins syndrome mouse model by genetic restoration of Tcf4 expression
Source: eLife. 2022 May 10;11:e72290. doi: 10.7554/eLife.72290 (PMC9090324; doi:10.7554/eLife.72290)
Supplement: Figure 1—source data 2. [file elife-72290-fig1-data2.xlsx]

## Sheet: Figure 1B
Control	Tcf4STOP/+	Tcf4STOP/+::Actb-Cre
1.00243	0.681995	0.881506
0.997566	0.760376	1.24397
1.4775	0.782935	0.825318
0.884525	0.485041	1.26222
0.70541	0.487766	0.996618
0.932562	0.760377
1	0.293256

## Sheet: Figure 1C
Control	Tcf4STOP/+	Tcf4STOP/+::Actb-Cre
0.874278	0.460618	1.00893
1.12572	0.607324	1.12619
0.71729	0.566636	0.827745
0.93859	0.377664	1.27123
1.0915	0.650084	1.13946
1.25262	0.803216
1	0.575513

## Sheet: Figure 1D
Control	Tcf4STOP/+	Tcf4STOP/+::Actb-Cre
62.64	34.11	67.01
64.26	47.71	71.1
43.01	35.66	69.66
44.38	59.59	43.03
46.49	57.62	66.14
72.09	64.9	48.89
75.73	53.3	71.8
52.72	43.26	58.95
51.19	39.63	58.02
42.22	51.98	60.59
46.49	70.96	60.25
60.04	61.23	56.94
46.71	59.63	58.33
54.7	45.59	46.89
76.63	40.65	62.94
67.47	50.67
73.67	63.35
57.48	46.65
56.47	29.26
61.02	61.8
65.09	36.27
61.69	60.98
78.03
87.15
57.06
56.19
55.42
57.22
50.55
72.93
63.67
89.14
39.66
63.59
59.03
53.3

## Sheet: Figure 1F
Control				Tcf4STOP/+				Tcf4STOP/+::Actb-Cre
1	2	3	4	1	2	3	4	1	2	3	4
24.11	34.82	39.29	54.46	25.45	38.18	47.27	57.27	27.1	57.01	55.14	63.55
30.56	48.15	62.96	64.81	10.19	27.78	36.11	46.3	34.86	47.71	61.47	79.82
18.35	25.69	44.04	52.29	0.93	11.11	18.52	20.37	28.18	43.64	49.09	62.73
25.23	30.84	39.25	38.32	16.04	28.3	44.34	44.34	24.77	41.28	45.87	48.62
24.07	37.96	39.81	44.44	15.45	23.64	40	49.09	26.85	50.93	66.67	75.93
34.23	54.05	66.67	78.38	6.48	14.81	19.44	20.37
5.61	13.08	19.63	29.91	6.8	11.65	19.42	29.13
15.45	30	41.82	53.64	8.18	9.09	14.55	15.45
36.7	59.63	74.31	79.82	9.09	17.27	29.09	37.27
20.18	44.95	54.13	58.72	6.36	10.91	13.64	20.91
44.86	63.55	65.42	89.72
28.97	42.06	45.79	51.4
28.57	50	66.96	79.46

## Sheet: Figure 1E
Distance (m)																		Total distance (m)			Time in center zone (%)
Control						Tcf4STOP/+						Tcf4STOP/+::Actb-Cre						Control	Tcf4STOP/+	Tcf4STOP/+::Actb-Cre	Control	Tcf4STOP/+	Tcf4STOP/+::Actb-Cre
5	10	15	20	25	30	5	10	15	20	25	30	5	10	15	20	25	30	79.1	68.14	53.08	10.07	9.11	6.44
6.14	8.14	7.71	9.56	7.48	4.27	8.34	8.2	5.94	4.68	3.09	0.75	6.38	6.1	4.19	3.07	4.41	3.7	81.46	63.95	63.26	9.68	12	7.31
11.8	7.41	7.52	6.94	4.32	8.63	9.53	6.76	6.35	5.17	2.32	3.31	10.87	4.52	6.61	5.9	3.03	3.62	53.38	99.32	64.71	2.67	15.21	5.74
8.54	6.04	5.31	1.26	3.16	2.58	13.78	7	7.81	6.35	6.05	6.45	5.82	4.03	4.54	1.57	5.12	0.01	68.49	144.33	65.7	4.63	9.48	15.98
9.78	5.82	6.11	5.33	4.68	2.92	25.64	13.52	13.76	16.8	14.48	12.12	10.29	6.77	4.98	1.95	6.98	3.78	70.62	96.62	62.82	15.5	16.44	17.6
6.46	4.75	4.98	5.13	6.4	3.88	22.15	14.11	13.22	13.12	5.58	7.32	4.07	2.52	3.37	3.26	5	3.51	49.22	58.74	55.88	6.31	5.25	7.66
8.14	4.45	5.67	2.99	6.04	1.68	5.71	3.79	3.85	3.48	0.61	3.05	6.66	2.91	4.15	4.19	6.14	7.39	71.68	106.96	79.18	5.28	6.2	4.78
6.57	3.08	4.35	0.85	2.77	1.43	16.74	10.95	10.65	7.04	7.6	7.46	9.58	4.83	3.2	5.76	4.84	4.29	72.81	158.08	58.56	5.76	6.81	10.13
9.71	6.18	4	4.41	4.52	4.3	21.87	12.29	9.46	12.29	10.63	12.5	7.57	5.9	3.08	3.77	4.93	4.03	74.42	119.34	80.56	8.22	10.93	7.75
6.02	8.88	6.69	8.63	8.67	12.78	15.37	11.99	9.23	10.73	4.32	8.03	8.29	8.02	6.64	5.83	5.2	6.3	90.88	126.14	80.28	19.05	8.56	16.79
8.84	6.34	6.73	6.63	4.52	4.15	26.47	11.62	11.26	5.34	5.27	3.11	12.42	6.38	6.79	3.51	6.04	5	103.36	109.54		10.88	5.85
14.04	7.47	6.96	4.35	7.35	5.27	19.71	9.79	7.9	6.74	6.26	4.37							91.64	86.08		10.04	9.72
13.23	11.44	6.04	6.11	6.04	8.82	10.7	7.07	6.03	5.58	6.85	6.81							42.57	44.53		3.06	6.74
12.17	8.35	5.03	6.53	8.9	4.84	10.6	7.29	5.18	8.75	3.56	9.15							30.83	74.62		3.36	4.9
10.77	6.77	6.64	5.7	7.29	5.4	19.55	12.46	8	7.79	11.95	14.87							51.61	58.81		7.58	6.39
10.26	5.86	4.41	4.47	4.35	1.48	10.44	10.09	12.97	9.46	10.2	5.65							34.73	58.94		5.96	13.55
10.87	7.04	6.82	9.58	7.22	10.08	15.52	9.55	7.33	7.63	9.36	9.55							50.24	60.45		5.81	21.64
10.31	5.01	5.2	4.71	7.48	2.02	16.99	8.17	7.22	12.09	8.85	7.13							37.04	92.41		2.44	8.96
14.94	6.21	6.47	5.53	7.61	9.48	30.46	18.2	13.41	10.34	6.26	13.74							48.29	53.47		9.41	9.34
9.93	6.86	4.64	6.05	5.11	4.45	22.28	7.94	6.97	4.77	6.13	5.38							48.22	67.3		2.84	11.46
11.56	7.61	7.52	6.77	6.55	8.28	20.92	9.86	9.25	8.6	9.79	8.88							56.8	110.88		8.66	9.67
17.71	9.54	5.81	5.89	6.41	2.86	24.17	18.31	19.03	16.03	20.84	12.5							44.69	69.26		4.14	19.95
11.18	11.27	10.55	10.54	6.08	7.18	14.89	12.18	11.17	10.01	12.41	8.6							46.36	82.95		3.83	10.63
11.99	5.93	8.71	6.31	4.01	7.74	20.9	14.16	12.6	12.56	12.22	10.51							41.76			4.93
12.58	7.45	6.7	6.01	8.43	5.19													49.14			3.43
11.66	6.29	6.67	6.64	7.98	2.52													33.22			5.77
10.34	10.31	6.52	8.51	5.06	8.4													62.07			5.45
11.15	4.08	5.47	3.7	5.33	3.49													94.76			17.71
9.97	6.41	3.57	2.95	2.81	7.16													72.18			9.84
19.13	7.44	5.68	5.32	5.04	4.77													54.94			7.56
11.31	6.99	4.23	5.13	3.13	5.3
8.72	5.65	3.88	5.26	0.44	3.52

## Sheet: Figure 1G
% Arm time	Closed	Open	% Entry	Closed	Open	% Time
Control	60.71	39.29	Control	56.8	22.4	Control	Tcf4STOP/+	Tcf4STOP/+::Actb-Cre
	76.47	23.53		51.5	23.2	20.88	17.68	12.65
	60.71	39.29		77.6	11.1	25.33	11.52	14.8
	75.86	24.14		74.8	11.2	11.27	20.08	8.45
	68.75	31.25		76.9	10.1	14.07	11.03	15.4
	71.43	28.57		72.4	19.3	13.03	8.27	11.6
	64.29	35.71		68.5	18.8	8.23	14.8	12.45
	75	25		46.7	33.2	12.73	9.75	10.77
	64.71	35.29		60.1	23.5	20.13	8.45	6.23
	65.38	34.62		49.6	35	16.28	9.57	12.3
	73.33	26.67		67.9	14.4	15.18	5.9	9.55
	67.65	32.35		56.6	32.1	17.63	10.48
	65.52	34.48		60.6	21.4	11.33	9.67
	47.62	52.38		48.9	39.1	18.08	14.35
	62.26	37.74		67.3	11.3	10.8	14.83
	67.14	32.86		74	19.9	21.42	10.52
	74.58	25.42		58.8	26.2	6.2	15.9
	80	20		81.7	9.9	15	17.62
	71.79	28.21		58.6	25.6	8.43	11.92
	69.05	30.95		52.8	26.7	15.78	13.03
	67.19	32.81		49.3	28.4	17.62	18.02
	56.52	43.48		74	18.6	22.35	8.83
	68.42	31.58		64.7	25.3	7.4	7.85
	55.71	44.29		62.8	25.9	9.98	9.9
	59.52	40.48		61.1	22.7	11.37
	70.67	29.33		41.2	42.7	16.28
	54.55	45.45		72.6	16.5	16.18
	45.9	54.1		22.9	67	10.8
	50.94	49.06		43.8	36.7	10.2
	62.96	37.04		63.2	26.7	19.5
Tcf4STOP/+	46.43	53.57	Tcf4STOP/+	55.4	26.9	10
	56.67	43.33		66.9	21.6
	60	40		54.8	25.2
	52.63	47.37		51.2	37.8
	60.47	39.53		50.3	40.5
	60.47	39.53		54.5	29.7
	59.09	40.91		34	56.3
	51.16	48.84		36.9	54.6
	51.11	48.89		43.3	47
	57.89	42.11		34.1	59.8
	54.35	45.65		51.6	37.9
	68.06	31.94		62.7	27.6
	66.1	33.9		44.9	39.7
	70.59	29.41		52	33.2
	59.22	40.78		60.5	28.9
	45.59	54.41		35.2	49
	55.41	44.59		39.8	42.6
	41.33	58.67		43.6	43.2
	52.7	47.3		56.1	30.9
	61.11	38.89		34.1	47.9
	36.21	63.79		41.5	49.4
	33.33	66.67		62.4	29.8
	54.55	45.45		44.4	45.7
Tcf4STOP/+::Actb-Cre	79.63	20.37	Tcf4STOP/+::Actb-Cre	77.6	9.8
	80	20		72.7	12.6
	69.05	30.95		73.8	17.8
	66.67	33.33		63.8	20.9
	72.55	27.45		63.7	24.7
	67.31	32.69		65.8	21.7
	71.43	28.57		68.8	20.4
	70.37	29.63		77.3	16.4
	66.18	33.82		62.5	25.2
	53.45	46.55		38.7	51.7
