# Supplementary material for: Rescue of behavioral and electrophysiological phenotypes in a Pitt-Hopkins syndrome mouse model by genetic restoration of Tcf4 expression
Source: eLife. 2022 May 10;11:e72290. doi: 10.7554/eLife.72290 (PMC9090324; doi:10.7554/eLife.72290)
Supplement: Figure 2—source data 1. [file elife-72290-fig2-data1.xlsx]

## Sheet: Figure 2B
Control	Tcf4STOP/+	Tcf4STOP/+::Gad2-Cre	Control	Tcf4STOP/+	Tcf4STOP/+::Neurod6-Cre
136.67	178.4	166.41	120.97	134.38	151.99
136.5	170.92	118.58	108.59	128.64	148.5
119.91	160.16	146.88	104.83	124.23	176.83
103.42	137.46	180.32	91.83	167.03	112.66
100.96	102.25	111.96	97.59	173.74	113.31
98.93	126.99	102.75	92.94	123.18	112.79
134.82	162.72	85.7	101.04	136.49	137.89
106.59		159.89	103.43
84.75		193.87	79.36
101.47		162.29	97.61
107.73		162.87	94.15
126.45			87.17
140.59			114.19
104.27			97.79
92.85
95.06
108.07
87.22
119.21

## Sheet: Figure 2C
Control	Tcf4STOP/+	Tcf4STOP/+::Gad2-Cre	Control	Tcf4STOP/+	Tcf4STOP/+::Neurod6-Cre
67.41	41.94	58.7	57.44	50.82	64.86
58.49	47.93	46.15	68.75	64.89	57.58
62.45	29.79	42.98	56.41	35	57.78
60.22	29.91	61.02	58.85	27.06	45.35
42.59	51.29	46.12	55.48	36.21	52.08
60.81	49.14	68.97	63.21	43.97	76.74
59.45	45.61	56.47	41.94	34.44	54.66
49.49		45.71	51.56	47.1
56.76		33.77	69.01
46.51			60.14
49.55			64.47
83.2			52.09
75.95			55.51
47.22			54.58
75.56
69.12
40.76
60.71

## Sheet: Figure 2D
% Arm time	Closed	Open	% Entry	Closed	Open	% Arm time	Closed	Open	% Entry	Closed	Open
Control	54.36	26.41	Control	67.57	32.43	Control	63.1	12.01	Control	64	36
	70.5	19.89		60	40		51.44	17.24		46.88	53.13
	51.36	23.08		68.75	31.25		60.93	12.52		51.85	48.15
	56.36	20.16		41.38	58.62		65.79	2.15		76.67	23.33
	46.42	29.98		61.7	38.3		67.63	5.9		84	16
	52.37	32.08		65.63	34.38		52.57	17.87		52	48
	72.97	10.92		75	25		61.56	14.82		58.33	41.67
	49.39	34.63		63.89	36.11		64.44	10		67.74	32.26
	57.93	24.1		68.75	31.25		60.16	9.9		71.43	28.57
	63.96	23.04		45.83	54.17		45.97	13.64		70.59	29.41
	51.91	29.13		65.22	34.78		39.73	22.73		55.26	44.74
	62.76	20.63		62.86	37.14		57.04	8.1		76.92	23.08
	60.68	19.46		65.85	34.15		58.39	10.79		67.5	32.5
	63.6	19.34		76	24		44.73	15.93		50	50
	51.8	26.72		61.76	38.24		54.27	10.89		65.12	34.88
	47.63	33.47		61.11	38.89	Tcf4STOP/+	54.71	16.13	Tcf4STOP/+	53.66	46.34
	76.8	12.27		70.37	29.63		53.61	16.12		59.46	40.54
	76.95	13.19		75	25		53.43	15.37		58.06	41.94
	70.53	9.57		80.56	19.44		35.62	20.86		67.86	32.14
Tcf4STOP/+	37.77	40.95	Tcf4STOP/+	41.3	58.7		26.15	30.37		24.44	75.56
	36.9	45.65		35.71	64.29		6.95	42.94		17.39	82.61
	24.98	59.66		27.91	72.09		56.36	13.42		65.71	34.29
	26.15	52.89		36.36	63.64		62.1	14.25		48	52
	49.49	30.51		54.84	45.16	Tcf4STOP/+::Neurod6-Cre	60.34	11.64	Tcf4STOP/+::Neurod6-Cre	64.86	35.14
	36.65	46.72		43.18	56.82		66.58	10.27		63.16	36.84
	39.27	50.78		37.04	62.96		52.76	13.32		65.52	34.48
Tcf4STOP/+::Gad2-Cre	23.11	60.53	Tcf4STOP/+::Gad2-Cre	35.48	64.52		58.28	8.95		58.62	41.38
	17.52	62.46		38.89	61.11		54.62	10.46		69.23	30.77
	3.15	85.17		21.05	78.95		66.7	7.78		57.89	42.11
	56.42	34.67		42.31	57.69		47.18	16.8		51.52	48.48
	25.6	61.73		35.71	64.29
	59.86	26.53		61.11	38.89
	62.63	21.78		68.97	31.03
	29.85	57.02		38.24	61.76
	40.5	44.2		41.3	58.7
	60.32	20.55		78.38	21.62
	33.78	50.92		41.03	58.97

## Sheet: Figure 2E
	Day						Day
	1	2	3	4	7		1	2	3	4	7
Control	14.15	31.13	36.79	46.23	65.09	Control	33.94	45.87	57.8	74.31	93.58
	22.52	42.34	67.57	80.18	97.3		32.11	40.37	55.96	58.72	72.48
	25	25	41.35	48.08	75		27.93	43.24	50.45	50.45	67.57
	40.78	40.78	66.99	66.99	83.5		28.21	42.74	62.39	83.76	100
	16.19	16.19	30.48	36.19	59.05		28.7	40	48.7	55.65	65.22
	31.25	39.29	39.29	43.75	59.82		26.17	34.58	36.45	39.25	63.55
	19.83	56.03	62.93	68.97	87.93		28.83	28.83	40.54	53.15	79.28
	47.71	45.87	54.13	66.97	88.07		22.41	37.07	60.34	75.86	98.28
	17.43	29.36	35.78	38.53	56.88		23.68	29.82	39.47	55.26	85.96
	32.08	48.11	54.72	66.98	97.17		17.39	34.78	47.83	62.61	77.39
	22.55	25.49	32.35	43.14	75.49		17.24	34.48	54.31	68.97	98.28
	44.14	65.77	73.87	86.49	100		12.17	34.78	45.22	54.78	73.04
	32.11	47.71	54.13	75.23	88.07		25.23	42.99	48.6	60.75	91.59
	11.32	11.32	33.96	34.91	36.79		26.13	27.93	39.64	44.14	61.26
	30.97	43.36	41.59	57.52	84.96		19.27	28.44	33.03	39.45	54.13
	13.91	27.83	43.48	53.91	79.13	Tcf4STOP/+	18.18	18.18	27.27	31.82	61.82
	26.36	41.82	51.82	66.36	91.82		15.32	29.73	40.54	46.85	63.96
	30.91	40.91	42.73	48.18	71.82		2.78	8.33	18.52	31.48	48.15
	12.73	23.64	33.64	38.18	66.36		12.17	7.83	10.43	11.3	25.22
Tcf4STOP/+	8.49	16.98	30.19	33.96	43.4		11.3	15.65	21.74	29.57	51.3
	17.59	26.85	38.89	40.74	75		12.39	13.27	14.16	19.47	41.59
	3.64	17.27	21.82	30	49.09		12.15	18.69	21.5	29.91	53.27
	0	6.67	8.57	12.38	33.33		7.89	14.91	23.68	25.44	34.21
	0.95	0.95	4.76	12.38	26.67	Tcf4STOP/+::Neurod6-Cre	20.18	38.53	48.62	54.13	93.58
	0	10.62	15.04	23.89	38.94		9.65	28.95	44.74	50.88	67.54
	10.53	11.4	24.56	28.95	36.84		22.22	36.75	50.43	68.38	78.63
Tcf4STOP/+::Gad2-Cre	14.02	35.51	45.79	71.03	97.2		12.17	22.61	30.43	38.26	53.04
	25.96	50	60.58	67.31	92.31		19.83	29.31	44.83	50.86	73.28
	20	33.33	48.57	55.24	67.62		13.91	31.3	33.04	37.39	61.74
	6.73	21.15	25	26.92	30.77		17.86	27.68	38.39	43.75	54.46
	18.87	18.87	33.96	38.68	56.6
	21.93	35.96	42.98	57.89	58.77
	11.4	24.56	34.21	42.98	60.53
	21.74	23.48	29.57	39.13	53.91
	5.45	13.64	28.18	29.09	46.36
	8.04	13.39	19.64	20.54	31.25
	7.34	12.84	16.51	25.69	34.86
