# Supplementary material for: Rescue of behavioral and electrophysiological phenotypes in a Pitt-Hopkins syndrome mouse model by genetic restoration of Tcf4 expression
Source: eLife. 2022 May 10;11:e72290. doi: 10.7554/eLife.72290 (PMC9090324; doi:10.7554/eLife.72290)
Supplement: Figure 3—source data 1. [file elife-72290-fig3-data1.xlsx]

## Sheet: Figure 3G
	Tcf4STOP/+ + Vehicle				Tcf4STOP/+ + PHP.eB/Cre
P10	1.128	1.068	0.83		0.994	1.146	1.002
P17	0.957	0.931	1.097	1.024	1.161	1.332	1.673
