# Supplementary material for: Rescue of behavioral and electrophysiological phenotypes in a Pitt-Hopkins syndrome mouse model by genetic restoration of Tcf4 expression
Source: eLife. 2022 May 10;11:e72290. doi: 10.7554/eLife.72290 (PMC9090324; doi:10.7554/eLife.72290)
Supplement: Figure 4—source data 1. [file elife-72290-fig4-data1.xlsx]

## Sheet: Figure 4 - source data 1
						Open field (Distance)		Object location (% in novel)		Elevated plus maze (% Open entry)		Elevated plus maze (% Open arm time)		Nest building (day 7)
		Tcf4+/+	Tcf4STOP/+	Tcf4+/+	Tcf4STOP/+	Tcf4+/+	Tcf4STOP/+	Tcf4+/+	Tcf4STOP/+	Tcf4+/+	Tcf4STOP/+	Tcf4+/+	Tcf4STOP/+	Tcf4+/+	Tcf4STOP/+
Group #	Treatment	n	n	Sex F/M (n)	Sex F/M (n)	Mean (SD)	Mean (SD)	Mean (SD)	Mean (SD)	Mean (SD)	Mean (SD)	Mean (SD)	Mean (SD)	Mean (SD)	Mean (SD)
1	Vehicle	7	6	4/3	1/5	95.20 (14.48)	133.07 (23.71)	56.58 (11.05)	43.68 (9.08)	49.12 (6.68)	65.36 (5.05)	15.78 (4.89)	31.89 (7.62)	75.80 (23.79)	40.51 (17.29)
	Virus	7	8	5/2	5/3	90.39 (23.07)	111.7 (32.3)	66.90 (7.25)	54.01 (6.43)	43.65 (8.81)	58.13 (12.11)	15.64 (6.19)	24.8 (8.7)	67.74 (27.22)	63 (12.35)
2	Vehicle	9	8	4/5	5/3	114.09 (26.38)	142.27 (34.68)	63.32 (13.25)	46.96 (17.6)	37.42 (8.36)	55.13 (19.63)	14.64 (3.51)	23.59 (10.48)	82.07 (20.6)	30.49 (13.49)
	Virus	9	7	5/4	3/4	109.5 (13.57)	117 (21.51)	62.91 (13.73)	60.36 (18.52)	35.74 (8.75)	40.67 (11.38)	11.01 (3.85)	15.41 (8.52)	73.71 (14.11)	59.72 (24.24)
