# Supplementary material for: Rescue of behavioral and electrophysiological phenotypes in a Pitt-Hopkins syndrome mouse model by genetic restoration of Tcf4 expression
Source: eLife. 2022 May 10;11:e72290. doi: 10.7554/eLife.72290 (PMC9090324; doi:10.7554/eLife.72290)
Supplement: Figure 4—source data 2. [file elife-72290-fig4-data2.xlsx]

## Sheet: Figure 4B
	Distance (m)						Total distance (m)
	5	10	15	20	25	30	Tcf4+/+ + Vehicle	Tcf4+/+ + PHP.eB/Cre	Tcf4STOP/+ + Vehicle	Tcf4STOP/+ + PHP.eB/Cre
Tcf4+/+ + Vehicle	18.66	16.2	9.07	28.19	20.13	9.94	102.2	104.51	124.41	90.32
	15.94	10.66	11.78	16.48	15.08	12.44	82.37	78.23	155.94	163.13
	16.16	13.98	16.29	12.85	20.9	17.23	97.43	132.43	164.46	70.17
	15.44	14.36	14.07	12.97	13.84	9.71	80.39	76.04	100.99	148.17
	15.89	21.35	21.31	18.81	15.75	16.22	109.33	82.82	118.97	123.42
	12.99	15.15	13.04	15.61	11.4	11.68	79.87	62.44	133.62	117.92
	21.66	17.8	18.38	21.89	15.78	19.3	114.81	96.29	165.788	95.21
	26.5023	20.0151	19.032	18.087	18.1648	12.7817	114.584	109.709	183.901	85.25
	22.7054	18.1333	13.7679	14.5105	14.0746	12.0728	95.27	122.353	142.452	140.791
	27.3929	21.4227	15.571	19.9111	23.1516	18.2233	125.673	95.9399	181.9	130.822
	22.7238	13.8855	15.5594	11.9414	12.855	10.0395	87.0046	104.843	83.896	144.739
	28.3259	18.9247	14.3235	16.2977	20.2169	17.3647	115.453	82.1639	141.25	98.0003
	16.3659	15.8787	19.691	11.9961	13.8581	16.3715	94.1613	111.776	111.856	109.377
	16.4631	16.1988	14.5176	17.0556	13.5276	17.8819	95.6507	124.13	127.129	91.2424
	34.8976	32.2167	32.6923	27.7132	19.2224	26.1933	172.936	114.572		104.033
	24.5538	19.0745	22.8892	21.3439	17.5774	20.6094	126.06	119.97
Tcf4+/+ + PHP.eB/Cre	11.67	12.76	21.93	17.45	20.29	20.4
	13.38	12.76	13.93	13.32	12.15	12.69
	17.78	16.94	17.97	25.88	27.24	26.61
	11.91	13.07	13.12	13.23	13.34	11.37
	9.51	14.97	16.54	19.89	14.29	7.63
	9.27	11.25	11.59	10.92	13.53	5.88
	23.5	17.21	16.13	11.41	13.58	14.47
	20.8621	18.1005	18.7639	18.649	16.5012	16.8237
	25.8269	22.931	16.9526	17.4516	21.6755	17.5114
	17.0989	17.4379	18.7604	11.8158	15.541	15.2856
	23.1323	19.3419	16.1001	16.0441	16.5314	13.6925
	16.6557	13.2407	12.4205	14.3263	12.4563	13.0644
	24.3994	21.2748	19.3078	13.449	17.4381	15.9061
	23.4842	26.7156	19.2012	18.8795	14.057	21.7906
	25.4341	24.064	17.4005	15.1826	16.2052	16.2855
	24.1239	23.4187	19.3557	18.8123	19.962	14.2945
Tcf4STOP/+ + Vehicle	18.84	25.75	25.08	21.78	17.52	15.44
	16.65	31.09	29.54	26.28	22.71	29.67
	28.38	33.45	29.49	23.21	25.07	20.85
	19.59	17.73	15.43	20.4	14.51	13.33
	20.6	19.66	15.84	17.51	21.01	24.33
	22.45	23.72	19.68	22.75	24.7	20.31
	31.0887	29.0677	28.8396	27.6106	20.2554	28.9206
	27.7463	31.703	29.0607	29.1707	32.8357	33.3818
	27.4289	19.9764	27.2288	26.3834	22.2348	19.1994
	42.7986	34.89	30.6551	28.8474	23.7849	20.9186
	22.58	15.6081	15.0597	13.0145	9.60088	8.0327
	22.2441	23.9091	26.3645	25.1286	23.9043	19.6837
	17.0848	19.2885	18.631	18.921	20.1728	17.7564
	27.1501	22.5691	19.3462	18.8293	21.3797	17.8536
Tcf4STOP/+ + PHP.eB/Cre	13.04	11.09	13.7	16.39	17.84	18.25
	27.13	30.46	29.31	27.41	24.56	24.25
	7.48	13.37	14.53	12.54	6.6	15.65
	14.22	22.35	28.98	24.9	25.13	18.58
	19.7	20.69	22.71	20.1	17.68	22.54
	22.34	19.35	16.88	22.31	18.79	18.25
	25.03	14.46	16.16	14.3	13.78	11.49
	16.74	16.27	14.25	14.78	8.87	14.34
	26.8317	26.6368	24.4055	21.0225	21.5812	20.3093
	27.7827	22.5	24.8731	16.0686	19.7006	19.8938
	32.8503	27.4142	21.935	19.7878	20.5306	22.2094
	17.7524	17.2525	15.6584	16.3303	15.684	15.3165
	22.6962	21.8366	16.7184	19.0107	17.0139	12.0959
	10.6513	17.2593	15.6783	15.5737	14.6661	17.3966
	23.5953	20.7039	18.5535	17.5439	15.5511	8.08506

## Sheet: Figure 4C
Tcf4+/+ + Vehicle	Tcf4+/+ + PHP.eB/Cre	Tcf4STOP/+ + Vehicle	Tcf4STOP/+ + PHP.eB/Cre
80.95	76.19	20.16	57.78
53.33	53.1	35.71	36.51
76.92	46.86	44.36	85.85
61.76	53.66	38.46	50.17
69.61	58.14	42.14	52
62.5	81.63	57.78	85.42
46.43	67.31	58.86	54.8
74.14	80.37	64.19	59.08
44.26	48.96	52.87	53.84
70.16	77.78	36.74	57.12
42.55	63.31	45.83	46.62
48.85	63.08	51.06	59.63
56.1	63.44	31.91	43.56
54.03			58.18
51.67
72.73

## Sheet: Figure 4D
% Arm time	Closed	Open	% Entry	Closed	Open
Tcf4+/+ + Vehicle	51.62	13.91	Tcf4+/+ + Vehicle	56.67	43.33
	31.87	23.62		48.72	51.28
	65.78	7.09		38.89	61.11
	31.66	16.43		51.85	48.15
	50.47	15.97		50	50
	41.32	17.25		50	50
	42.44	16.21		60	40
	55.72	13		59.46	40.54
	51.61	16.61		66.67	33.33
	51.86	14.85		72.41	27.59
	49.81	14.32		68.97	31.03
	70.67	8.99		71.43	28.57
	49.97	15.97		55	45
	36.93	21.84		46.88	53.13
	48.01	13.99		59.09	40.91
	45.8	12.21		63.33	36.67
Tcf4+/+ + PHP.eB/Cre	46.81	17.11	Tcf4+/+ + PHP.eB/Cre	68	32
	25.31	27.88		40	60
	35.12	16.47		62.96	37.04
	64.35	11.41		56.25	43.75
	69.52	9.15		59.09	40.91
	56.46	11.51		53.57	46.43
	45.97	15.96		54.55	45.45
	74.65	8.29		68.18	31.82
	56.36	12.56		64.1	35.9
	58.91	8.35		61.11	38.89
	49.77	18.6		45.45	54.55
	76.95	7.77		61.11	38.89
	69.18	7.57		67.74	32.26
	56.74	15.48		65.38	34.62
	61.58	9.87		78.57	21.43
	69.6	10.55		66.67	33.33
Tcf4STOP/+ + Vehicle	20.89	21.9	Tcf4STOP/+ + Vehicle	37.14	62.86
	12.79	31.97		34.78	65.22
	32.15	24.28		34.29	65.71
	19.68	33.25		37.5	62.5
	10.92	40.21		25	75
	12.69	39.74		39.13	60.87
	33.57	27.5		27.27	72.73
	9.94	40.03		24.14	75.86
	46.85	17.13		63.64	36.36
	53.53	13.92		64.81	35.19
	47.31	16.09		52.94	47.06
	34.73	24.18		40	60
	56.26	12.94		66.67	33.33
	16.56	36.93		19.51	80.49
Tcf4STOP/+ + PHP.eB/Cre	48.99	9.22	Tcf4STOP/+ + PHP.eB/Cre	55	45
	17.94	26.65		22.22	77.78
	17.81	36.51		56.25	43.75
	27.86	28.61		40	60
	27.88	28.03		33.33	66.67
	26.28	27.49		40.63	59.38
	46.19	14.44		53.13	46.88
	33.93	27.44		34.38	65.63
	33.2	30.03		75	25
	61.03	12.69		55.17	44.83
	79.17	4.75		72.22	27.78
	74.72	3.88		70.83	29.17
	31.61	20.63		53.33	46.67
	53.31	18.51		46.67	53.33
	40.52	15.62		50	50

## Sheet: Figure 4E
	Day						Day
	1	2	3	4	7		1	2	3	4	7
Tcf4+/+ + Vehicle	22.43	28.97	40.19	46.73	62.62	Tcf4STOP/+ + Vehicle	4.5	6.31	-0.9	2.7	9.91
	30.09	45.13	60.18	90.27	100		4.35	6.96	4.35	8.7	10.43
	14.91	24.56	35.09	44.74	56.14		3.64	0.91	2.73	12.73	9.09
	16.36	24.55	24.55	25.45	47.27		18.02	9.91	2.7	16.22	18.02
	26.36	41.82	44.55	55.45	95.45		13.04	10.43	4.35	9.57	13.91
	28.18	47.27	55.45	93.64	100		1.83	2.75	3.67	0.92	10.09
	14.91	24.56	28.95	31.58	50		4.59	2.75	0.92	9.17	8.26
	34.91	55.66	62.26	68.87	96.23		16.19	7.62	1.9	1.9	19.05
	29.36	44.04	53.21	62.39	85.32		2.83	5.66	3.77	3.77	17.92
	35.78	42.2	54.13	55.05	71.56		7.77	0.97	0	4.85	14.56
	34.58	68.22	75.7	90.65	100		0	0	1.01	1.01	9.09
	36.45	62.62	73.83	76.64	100		9.71	2.91	2.91	2.91	8.74
	0.98	11.76	16.67	19.61	34.31		4.81	9.62	0	6.73	30.77
	48.11	56.6	80.19	83.96	88.68	Tcf4STOP/+ + PHP.eB/Cre	9.65	13.16	10.53	18.42	23.68
	10.58	29.81	44.23	54.81	74.04		17.7	11.5	11.5	16.81	14.16
	23.08	35.58	45.19	55.77	88.46		3.45	0.86	4.31	6.03	24.14
Tcf4+/+ + PHP.eB/Cre	34.51	40.71	51.33	58.41	97.35		1.77	11.5	2.65	14.16	36.28
	13.27	23.01	36.28	41.59	65.49		11.01	11.01	11.01	16.51	15.6
	14.16	26.55	33.63	36.28	46.02		7.08	13.27	8.85	10.62	28.32
	11.4	20.18	19.3	21.93	21.05		12.73	1.82	5.45	8.18	27.27
	15.93	32.74	38.94	46.9	67.26		0	5.56	8.33	7.41	12.04
	14.78	32.17	41.74	56.52	83.48		4.59	3.67	6.42	5.5	11.01
	23.15	36.11	49.07	64.81	93.52		6.36	7.27	16.36	1.82	20
	30.91	35.45	47.27	51.82	74.55		24.27	1.94	11.65	6.8	25.24
	19.09	33.64	46.36	47.27	70.91		9.9	13.86	5.94	19.8	33.66
	24.76	55.24	67.62	76.19	96.19		30.77	6.73	15.38	8.65	33.65
	32.04	45.63	58.25	70.87	82.52		2.91	12.62	11.65	2.91	23.3
	4.72	6.6	17.92	20.75	47.17
	26.17	39.25	54.21	66.36	81.31
	27.62	41.9	53.33	54.29	75.24
	8.33	19.44	27.78	33.33	76.85
	16.35	28.85	30.77	40.38	58.65
Tcf4STOP/+ + Vehicle	4.5	10.81	9.91	12.61	22.52
	4.35	11.3	15.65	24.35	34.78
	3.64	4.55	7.27	20	29.09
	18.02	27.93	30.63	46.85	64.86
	13.04	23.48	27.83	37.39	51.3
	1.83	4.59	8.26	9.17	19.27
	4.59	7.34	8.26	17.43	25.69
	16.19	23.81	25.71	27.62	46.67
	2.83	8.49	12.26	16.04	33.96
	7.77	8.74	8.74	13.59	28.16
	0	0	1.01	2.02	11.11
	9.71	12.62	15.53	18.45	27.18
	4.81	14.42	14.42	21.15	51.92
Tcf4STOP/+ + PHP.eB/Cre	9.65	22.81	33.33	51.75	75.44
	17.7	29.2	40.71	57.52	71.68
	3.45	4.31	8.62	14.66	38.79
	1.77	13.27	15.93	30.09	66.37
	11.01	22.02	33.03	49.54	65.14
	7.08	20.35	29.2	39.82	68.14
	12.73	14.55	20	28.18	55.45
	0	5.56	13.89	21.3	33.33
	4.59	8.26	14.68	20.18	31.19
	6.36	13.64	30	31.82	51.82
	24.27	26.21	37.86	44.66	69.9
	9.9	23.76	29.7	49.5	83.17
	30.77	37.5	52.88	61.54	95.19
	2.91	15.53	27.18	30.1	53.4

## Sheet: Figure 4F
Male				Female
Tcf4+/+ + Vehicle	Tcf4+/+ + PHP.eB/Cre	Tcf4STOP/+ + Vehicle	Tcf4STOP/+ + PHP.eB/Cre	Tcf4+/+ + Vehicle	Tcf4+/+ + PHP.eB/Cre	Tcf4STOP/+ + Vehicle	Tcf4STOP/+ + PHP.eB/Cre
22.8	24.8	21.5	22	19.8	19.8	17.6	18.2
23.8	22.7	19	22.6	20.5	19.3	17	19.8
21.7	24.2	23.9	22.3	20	18.9	18.8	19.2
24.9	25.2	21.8	20.5	17.4	18.2	18.4	17.4
26	25	22.3	23.5	16.7	16.5	16.8	16.3
22.1	22.7	20.7	22.7	21.1	19.3	17	15.9
24.9		23	23.2	19	19.5		18.6
23.3		21.5		18.3	20.7		17.7
					20.4
					20.5

## Sheet: Figure 4G
Tcf4+/+ + Vehicle	Tcf4+/+ + PHP.eB/Cre	Tcf4STOP/+ + Vehicle	Tcf4STOP/+ + PHP.eB/Cre
478	445	422	438
482	435	440	437
479	495	416	456
483.8	464	437	454
458	449	427.5	428.8
460	460	434.3	444
459.1	438.9	420.7	436.2
474.8	477.6	435.1	432.5
476.2	478.3	451.3	430
476	491.1	439.8	433.2
454.4	453	410.6	440.6
467.3	451.5	448.7	431.8
463.4	458.5	438.7	443.9
455.1	459.4	419	429.2
477.5	464.6		428
467.8	477.8
