# Supplementary material for: Rescue of behavioral and electrophysiological phenotypes in a Pitt-Hopkins syndrome mouse model by genetic restoration of Tcf4 expression
Source: eLife. 2022 May 10;11:e72290. doi: 10.7554/eLife.72290 (PMC9090324; doi:10.7554/eLife.72290)
Supplement: Figure 5—source data 1. [file elife-72290-fig5-data1.xlsx]

## Sheet: Figure 5D
Tcf4+/+ + Vehicle	Tcf4+/+ + PHP.eB/Cre	Tcf4STOP/+ + Vehicle	Tcf4STOP/+ + PHP.eB/Cre
32181.1	42987.2	19991	23042.2
33402.1	59098.5	19467.2	24521.6
41621.9	28076	16152.9	19718.5
37684.1	44441.7	22188	25353.1
30182.2	18273.4	13568.3	35685.1
49986.4	32169.8	22039.9	21191.9
35283.9	39913.1	32024.5	35403.7
35316.4	26197.6	11518.3	24430.3
53472.2	54245.5	35709.6	30016.2
24580.7	54517	18716.3	27375.1
26837.6	49125.2	41226.8	53633.6
44960.9	58991	28990.5	31570.5
37175.1	54674	26470.6	26546.6
36096.9	42801.7		28241.2
27762.7

## Sheet: Figure 5E
Tcf4+/+ + Vehicle	Tcf4+/+ + PHP.eB/Cre	Tcf4STOP/+ + Vehicle	Tcf4STOP/+ + PHP.eB/Cre
Delta
14871.3	22414.8	11234.5	10938.9
14824.2	24530.6	11763.8	9528.43
19253.1	11617	8190.45	7697.3
15001.7	20980.4	9676.46	14317.6
12260.8	7411.11	7959.12	17607.1
22935.8	16653.9	11426.1	7991.13
16198	12497.8	14102.6	12600.4
15473.8	10795.9	6952.86	11806.6
26304.2	17815.9	20010.4	12489.5
12362.8	20182.1	10873.4	13183
10842.3	20318.7	23590.5	27713.1
15391.4	26601.1	15327.6	13495.8
15030	18518	12186.9	8931.93
15408.7	16845.7		10936.4
11578
Theta
7366.11	9026.09	3286.73	5010.78
8460.45	15126.4	3419.4	6176.68
9964.79	6756.57	3441.51	5680.38
10105.3	9744.59	5125.01	4970.19
7766.28	5211.45	2629.14	7707.91
12379.8	6923.06	3627.49	5758.46
7504.45	10698.4	6916.74	9167.1
8470.04	7359.27	1909.01	4491.45
12324.2	16643.1	6297.84	7496.54
4861.46	16034.2	2359.79	6081.94
6850.87	11724.7	6725.88	11471.7
11295.2	13017	4977.36	7589.53
9767.72	15440.3	6023.63	9584.43
9789.81	10791.1		8123.98
6869.88
Beta
2911.85	2968.9	2017.36	2287.8
3351.14	5271.75	1350.91	3110.57
3615.79	3269.4	1568.34	2034.26
4297.74	4257.05	3042.6	1916.87
3317.68	1829.25	626.423	3508.93
4608.66	2450.56	2736.92	2363.41
3788.37	5569.35	4640.38	4828.72
3571.83	2589.5	809.461	3030.03
4849.89	6774.58	3318.73	3594.8
2869.02	6180.8	2296.89	2702.44
3353.6	5988.46	3932.94	4684.56
6952.27	7079.92	3277.36	3756.58
4483.26	6531.75	3265.02	2788.47
3298.2	4708.91		3221.63
3318.55
Gamma
597.505	535.767	471.886	455.139
775.209	1052.49	212.259	757.55
699.959	594.256	356.436	394.382
1062.31	630.401	654.748	382.825
778.288	488.912	153.948	712.605
966.521	482.6	742.454	484.963
947.474	1534.07	1092.82	830.679
913.331	559.259	139.81	758.925
1419.36	1557.31	661.284	698.102
792.214	1509.98	694.129	599.446
853.848	1168.58	890.839	1149.22
2065.16	2069.76	367.02	723.792
1127.83	1838.28	853.9	859.792
775.31	1045.5		656.219
804.518
