# Supplementary material for: Rescue of behavioral and electrophysiological phenotypes in a Pitt-Hopkins syndrome mouse model by genetic restoration of Tcf4 expression
Source: eLife. 2022 May 10;11:e72290. doi: 10.7554/eLife.72290 (PMC9090324; doi:10.7554/eLife.72290)
Supplement: Figure 6—source data 1. [file elife-72290-fig6-data1.xlsx]

## Sheet: Figure 6E
Neocortex	Pyramidal layer (CA1)
8.71	12.327
5.7	3.315
9.31	43.292
8.07	5.589
10.48	9.383
12.39	8.742
9.69	13.864
11.01	6.946
31.67	17.589
12.11	4.625
4.98	3.792
3.91	5.109
11.83	9.645
10.05	19.798
4.49	4.333

## Sheet: Figure 6F
Tcf4+/+ + Vehicle	Tcf4STOP/+ + Vehicle	Tcf4STOP/+ + PHP.eB/Cre
Tcf4
1.347	0.541	0.832
1.095	0.477	0.792
0.842	0.512	0.731
0.9	0.438	0.795
0.995	0.57	0.63
0.927	0.557	0.728
0.97	0.726	0.782
1.239	0.722	0.68
1.068	0.554	1.084
1.048	0.585	0.815
1.325	0.561	0.751
0.752	0.611	0.665
0.851	0.546	0.608
0.992	0.592	0.725
0.856		0.551
Grin2a
1.132	0.786	0.554
1.287	0.509	0.949
0.876	0.658	0.663
1.103	0.668	0.833
1.004	0.569	1.084
0.765	0.747	0.668
0.925	0.563	0.738
1.253	0.732	1.194
1.117	0.599	1.022
1.328	0.62	0.882
1.276	0.677	0.881
0.73	0.763	0.802
0.88	0.769	0.918
0.915	0.727	0.712
0.718
Mal
1.255	0.869	0.569
0.962	0.72	0.889
1.022	0.755	1.06
0.844	0.724	0.977
0.831	0.571	1.128
1.09	0.705	0.846
1.061	0.749	0.817
1.197	0.672	0.955
1.054	0.611	0.849
1.136	0.757	0.732
0.985	0.668	0.731
0.841	0.608	0.668
0.804	0.679	0.744
1.121	0.714	0.715
0.934
Glra3
1.351	0.901	1.005
0.759	0.921	1.056
0.992	1.077	1.2
0.79	0.875	1.133
1.162	0.97	1.133
1.04	0.827	0.964
1.03	0.783	0.738
1.124	0.661	0.894
1.027	0.75	0.789
1.103	0.69	0.829
0.968	0.555	0.822
0.946	0.757	0.855
1.039	0.751	0.831
0.919	0.677	0.801
0.898
Lpar1
0.909	0.453	0.727
0.992	0.733	0.723
0.83	0.76	0.717
1.403	0.704	0.607
0.956	0.526	0.673
0.946	0.77	1.126
1.052	0.786	1.271
1.133	0.672	0.901
1.028	0.599	0.863
1.132	0.768	0.812
0.907	0.86	0.906
1.074	0.754	0.823
0.916	0.805	0.823
0.932	0.738	0.817
0.912
