# Supplementary material for: Rescue of behavioral and electrophysiological phenotypes in a Pitt-Hopkins syndrome mouse model by genetic restoration of Tcf4 expression
Source: eLife. 2022 May 10;11:e72290. doi: 10.7554/eLife.72290 (PMC9090324; doi:10.7554/eLife.72290)
Supplement: Supplementary file 1. [file elife-72290-supp1.xlsx]

## Sheet: Sheet1
Figure		Test	Comparison group	Summary	P value	ANOVA Table	F (DFn, DFd)	P value
Figure 1	B	Welch ANOVA followed by Dunnett’s post hoc	Control vs. Tcf4STOP/+	*	0.0156
			Control vs. Tcf4STOP/+:: β-Actin-Cre	ns	0.9817
			Tcf4STOP/+ vs. Tcf4STOP/+:: β-Actin-Cre	*	0.0152
	C		Control vs. Tcf4STOP/+	**	0.0012
			Control vs. Tcf4STOP/+:: β-Actin-Cre	ns	0.8375
			Tcf4STOP/+ vs. Tcf4STOP/+:: β-Actin-Cre	**	0.0016
	D		Control vs. Tcf4STOP/+	*	0.0146
			Control vs. Tcf4STOP/+:: β-Actin-Cre	ns	>0.9999
			Tcf4STOP/+ vs. Tcf4STOP/+:: β-Actin-Cre	*	0.024
	E (Center panel)		Control vs. Tcf4STOP/+	**	0.002
			Control vs. Tcf4STOP/+:: β-Actin-Cre	ns	0.4981
			Tcf4STOP/+ vs. Tcf4STOP/+:: β-Actin-Cre	*	0.018
	E (Right panel)		Control vs. Tcf4STOP/+	*	0.0451
			Control vs. Tcf4STOP/+:: β-Actin-Cre	ns	0.3557
			Tcf4STOP/+ vs. Tcf4STOP/+:: β-Actin-Cre	ns	0.9957
	E (Left panel)	2way ANOVA followed by Tukey’s post hoc				Interaction	F (10, 366) = 2.395	P=0.0092
						Time	F (5, 366) = 29.41	P<0.0001
						Group	F (2, 366) = 77.75	P<0.0001
	F					Interaction	F (6, 75) = 2.826	P=0.0155
						Day	F (1.828, 45.71) = 153.2	P<0.0001
						Group	F (2, 25) = 12.17	P=0.0002
	G (Arm time)					Interaction	F (2, 120) = 24.05	P<0.0001
						Arm	F (1, 120) = 168.0	P<0.0001
						Group	F (2, 120) = 0.1959	P=0.8223
	G (Entry)					Interaction	F (2, 120) = 0.000	P>0.9999
						Arm	F (1, 120) = 231.3	P<0.0001
						Group	F (2, 120) = 28.58	P<0.0001
	G (Center zone)	Welch ANOVA followed by Dunnett’s post hoc	Control vs. Tcf4STOP/+	ns	0.172
			Control vs. Tcf4STOP/+:: β-Actin-Cre	ns	0.645
			Tcf4STOP/+ vs. Tcf4STOP/+:: β-Actin-Cre	ns	0.893
Figure 1 – figure supplement 1	B (Male)	Welch ANOVA followed by Dunnett’s post hoc	Control vs. Tcf4STOP/+	**	0.0081
			Control vs. Tcf4STOP/+:: β-Actin-Cre	ns	0.9849
			Tcf4STOP/+ vs. Tcf4STOP/+:: β-Actin-Cre	*	0.0451
	B (Female)		Control vs. Tcf4STOP/+	**	0.0013
			Control vs. Tcf4STOP/+:: β-Actin-Cre	ns	0.8361
			Tcf4STOP/+ vs. Tcf4STOP/+:: β-Actin-Cre	ns	0.1193
	C		Control vs. Tcf4STOP/+	***	0.0001
			Control vs. Tcf4STOP/+:: β-Actin-Cre	ns	0.3272
			Tcf4STOP/+ vs. Tcf4STOP/+:: β-Actin-Cre	ns	0.0671
Figure 2	B (Left panel)	Ordinary One-Way ANOVA followed by Bonferroni’s post hoc	Control vs. Tcf4STOP/+	****	<0.0001
			Control vs. Tcf4STOP/+:: Neurod6-Cre	***	0.0004
			Tcf4STOP/+ vs. Tcf4STOP/+:: Neurod6-Cre	ns	0.8663
	B (Right panel)		Control vs. Tcf4STOP/+	**	0.0055
			Control vs. Tcf4STOP/+:: Gad2-Cre	**	0.0035
			Tcf4STOP/+ vs. Tcf4STOP/+:: Gad2-Cre	ns	0.9505
	C (Left panel)		Control vs. Tcf4STOP/+	**	0.0027
			Control vs. Tcf4STOP/+:: Neurod6-Cre	ns	0.9888
			Tcf4STOP/+ vs. Tcf4STOP/+:: Neurod6-Cre	**	0.0075
	C (Right panel)		Control vs. Tcf4STOP/+	**	0.0048
			Control vs. Tcf4STOP/+:: Gad2-Cre	ns	0.1901
			Tcf4STOP/+ vs. Tcf4STOP/+:: Gad2-Cre	ns	0.2696
	D (Time, left panel)	2way ANOVA followed by Tukey’s post hoc				Interaction	F (2, 54) = 8.212	P=0.0008
						Arm	F (1, 54) = 208.8	P<0.0001
						Group	F (2, 54) = 0.2849	P=0.7532
	D (Time, right panel)					Interaction	F (2, 68) = 30.37	P<0.0001
						Arm	F (1, 68) = 2.651	P=0.1081
						Group	F (2, 68) = 0.08781	P=0.9160
	D (Entry, left panel)					Interaction	F (2, 54) = 7.027	P=0.0019
						Arm	F (1, 54) = 22.45	P<0.0001
						Group	F (2, 54) = 5.109e-009	P>0.9999
	D (Entry, right panel)					Interaction	F (2, 68) = 32.09	P<0.0001
						Arm	F (1, 68) = 0.0036	P=0.9520
						Group	F (2, 68) = 4.487e-009	P>0.9999
	E (Left panel)					Interaction	F (8, 135) = 1.642	P=0.1185
						Day	F (4, 135) = 89.10	P<0.0001
						Group	F (2, 135) = 77.53	P<0.0001
	E (Right panel)					Interaction	F (8, 170) = 0.4908	P=0.8616
						Day	F (4, 170) = 44.22	P<0.0001
						Group	F (2, 170) = 50.78	P<0.0001
Figure 2 – figure supplement 2	A (Open field)	Unpaired t-test	Tcf4+/+ vs. Tcf4+/+::Neurod6-Cre	ns	0.2909
	A (24-h object location test)	Unpaired t-test	Tcf4+/+ vs. Tcf4+/+::Neurod6-Cre	ns	0.3399
	A (Entry, Elevated plus maze)	2way ANOVA followed by Bonferroni				Interaction	F (1, 26) = 0.2625	P=0.6127
						Arm	F (1, 26) = 40.52	P<0.0001
						Group	F (1, 26) = 3.767e-008	P=0.9998
	A (Time, Elevated plus maze)	2way ANOVA followed by Bonferroni				Interaction	F (1, 26) = 2.502	P=0.1258
						Arm	F (1, 26) = 324.3	P<0.0001
						Group	F (1, 26) = 0.8159	P=0.3747
	A (Nest building)	Unpaired t-test	Tcf4+/+ vs. Tcf4+/+::Neurod6-Cre	ns	0.7341
	B (Open field)	Unpaired t-test	Tcf4+/+ vs. Tcf4+/+::Gad2-Cre	ns	0.5212
	B (24-h object location test)	Unpaired t-test	Tcf4+/+ vs. Tcf4+/+::Gad2-Cre	ns	0.6208
	B (Entry, Elevated plus maze)	2way ANOVA followed by Bonferroni				Interaction	F (1, 34) = 0.8131	P=0.3735
						Arm	F (1, 34) = 92.12	P<0.0001
						Group	F (1, 34) = 3.141e-008	P=0.9999
	B (Time, Elevated plus maze)	2way ANOVA followed by Bonferroni				Interaction	F (1, 26) = 2.977	P=0.0935
						Arm	F (1, 26) = 174	P<0.0001
						Group	F (1, 26) = 0.1151	P=0.7365
	B (Nest building)	Unpaired t-test	Tcf4+/+ vs. Tcf4 +/+::Gad2-Cre	ns	0.7094
Figure 2 – figure supplement 3	A (Open field)	Unpaired t-test	Tcf4+/+ vs. Tcf4STOP/+	*	0.031
	A (24-h object location test)	Unpaired t-test	Tcf4+/+ vs. Tcf4STOP/+	**	0.0077
	B (Open field)	Unpaired t-test	Tcf4+/+::Gad2-Cre vs. Tcf4STOP/+::Gad2-Cre	*	0.035
	B (24-h object location test)	Unpaired t-test	Tcf4+/+::Gad2-Cre vs. Tcf4STOP/+::Gad2-Cre	**	0.0057
	C (Open field)	Unpaired t-test	Tcf4+/+::Olig2-Cre vs. Tcf4STOP/+:: Olig2-Cre	****	<0.0001
	C (24-h object location test)	Unpaired t-test	Tcf4+/+::Olig2-Cre vs. Tcf4STOP/+:: Olig2-Cre	*	0.015
Figure 4	B (Left panel)	2way ANOVA followed by Tukey’s post hoc				Interaction	F (15, 285) = 0.5963	P=0.8772
						Time	F (3.284, 187.2) = 10.77	P<0.0001
						Group	F (3, 57) = 6.398	P=0.0008
	B (Right panel)	Ordinary One-Way ANOVA followed by Bonferroni’s post hoc	Tcf4+/+ + vehicle vs. Tcf4+/+ + PHP.eB/Cre	ns	>0.9999
			Tcf4+/+ + vehicle vs. Tcf4STOP/+ + vehicle	**	0.0033
			Tcf4+/+ + vehicle vs. Tcf4STOP/+ + PHP.eB/Cre	ns	>0.9999
			Tcf4STOP/+ + vehicle vs. Tcf4STOP/+ + PHP.eB/Cre	*	0.0493
	C		Tcf4+/+ + vehicle vs. Tcf4+/+ + PHP.eB/Cre	ns	>0.9999
			Tcf4+/+ + vehicle vs. Tcf4STOP/+ + vehicle	**	0.0062
			Tcf4+/+ + vehicle vs. Tcf4STOP/+ + PHP.eB/Cre	ns	>0.9999
			Tcf4STOP/+ + vehicle vs. Tcf4STOP/+ + PHP.eB/Cre	ns	0.0505
	D (Time)	2way ANOVA followed by Tukey’s post hoc				Interaction	F (3, 114) = 17	P<0.0001
						Arm	F (1, 114) = 132	P<0.0001
						Group	F (3, 114) = 1.7	P=0.1627
	D (Entry)					Interaction	F (3, 114) = 15.02	P<0.0001
						Arm	F (1, 114) = 4.139	P=0.0442
						Group	F (3, 114) = 4.212e-008	P>0.9999
	E (Left panel)	2way ANOVA followed by Bonferroni’s post hoc				Interaction	F (4, 100) = 2.076	P=0.0896
						Day	F (4, 100) = 26.88	P<0.0001
						Group	F (1, 25) = 16.94	P=0.0004
	E (Right panel)	2way ANOVA followed by Bonferroni’s post hoc	Day3: Tcf4STOP/+ + vehicle vs. Tcf4STOP/+ + PHP.eB/Cre	**	0.008
			Day7: Tcf4STOP/+ + vehicle vs. Tcf4STOP/+ + PHP.eB/Cre	***	0.0002
	F (Male)	Ordinary One-Way ANOVA followed by Bonferroni’s post hoc	Tcf4+/+ + vehicle vs. Tcf4+/+ + PHP.eB/Cre	ns	>0.9999
			Tcf4+/+ + vehicle vs. Tcf4STOP/+ + vehicle	*	0.0238
			Tcf4+/+ + vehicle vs. Tcf4STOP/+ + PHP.eB/Cre	ns	0.28
			Tcf4STOP/+ + vehicle vs. Tcf4STOP/+ + PHP.eB/Cre	ns	>0.9999
	G	Ordinary One-Way ANOVA followed by Bonferroni’s post hoc	Tcf4+/+ + vehicle vs. Tcf4+/+ + PHP.eB/Cre	ns	0.3988
			Tcf4+/+ + vehicle vs. Tcf4STOP/+ + vehicle	****	<0.0001
			Tcf4+/+ + vehicle vs. Tcf4STOP/+ + PHP.eB/Cre	****	<0.0001
			Tcf4STOP/+ + vehicle vs. Tcf4STOP/+ + PHP.eB/Cre	ns	0.599
Figure 4 – figure supplement 1	Open field	Unpaired t-test	Tcf4+/+ + PHP.eB/GFP vs. Tcf4STOP/+ + PHP.eB/GFP	*	0.0266
	24-h object location test	Unpaired t-test	Tcf4+/+ + PHP.eB/GFP vs. Tcf4STOP/+ + PHP.eB/GFP	**	0.0069
	Entry, Elevated plus maze	2way ANOVA followed by Bonferroni				Interaction	F (1, 26) = 19.8	P=0.0001
						Arm	F (1, 26) = 79.0	P<0.0001
						Group	F (1, 26) = 1.16e-029	P>0.9999
	Time, Elevated plus maze	2way ANOVA followed by Bonferroni				Interaction	F (1, 26) = 16.28	P=0.0004
						Arm	F (1, 26) = 378.2	P<0.0001
						Group	F (1, 26) = 0.5535	P=0.4636
	Nest building	2way ANOVA followed by Bonferroni’s post hoc				Interaction	F (4, 65) =0.7245	P=0.5784
						Day	F (4, 65) = 10.47	P<0.0001
						Group	F (1, 65) = 73.05	P<0.0001
Figure 4 – figure supplement 2	Open field	Unpaired t-test	Tcf4+/+::CamK2a-Cre vs. Tcf4STOP/+::CamK2a-Cre	*	0.0294
	24-h object location test	Unpaired t-test	Tcf4+/+::CamK2a-Cre vs. Tcf4STOP/+::CamK2a-Cre	ns	0.4288
	Nest building	2way ANOVA followed by Bonferroni’s post hoc				Interaction	F (4, 56) = 3.38	P=0.0152
						Day	F (3.03, 42.4) = 148	P<0.0001
						Group	F (1, 14) = 0.960	P=0.3438
Figure 5	D	Welch ANOVA followed by Dunnett’s post hoc	Tcf4+/+ + vehicle vs. Tcf4+/+ + PHP.eB/Cre	ns	0.3547
			Tcf4+/+ + vehicle vs. Tcf4STOP/+ + vehicle	**	0.0023
			Tcf4+/+ + vehicle vs. Tcf4STOP/+ + PHP.eB/Cre	ns	0.0952
			Tcf4STOP/+ + vehicle vs. Tcf4STOP/+ + PHP.eB/Cre	ns	0.3907
	E (Theta)		Tcf4+/+ + vehicle vs. Tcf4+/+ + PHP.eB/Cre	ns	0.2745
			Tcf4+/+ + vehicle vs. Tcf4STOP/+ + vehicle	****	<0.0001
			Tcf4+/+ + vehicle vs. Tcf4STOP/+ + PHP.eB/Cre	ns	0.0959
			Tcf4STOP/+ + vehicle vs. Tcf4STOP/+ + PHP.eB/Cre	**	0.0034
	E (Beta)		Tcf4+/+ + vehicle vs. Tcf4+/+ + PHP.eB/Cre	ns	0.5148
			Tcf4+/+ + vehicle vs. Tcf4STOP/+ + vehicle	*	0.0151
			Tcf4+/+ + vehicle vs. Tcf4STOP/+ + PHP.eB/Cre	ns	0.1455
			Tcf4STOP/+ + vehicle vs. Tcf4STOP/+ + PHP.eB/Cre	ns	0.4835
	E (Gamma)		Tcf4+/+ + vehicle vs. Tcf4+/+ + PHP.eB/Cre	ns	0.9562
			Tcf4+/+ + vehicle vs. Tcf4STOP/+ + vehicle	*	0.0118
			Tcf4+/+ + vehicle vs. Tcf4STOP/+ + PHP.eB/Cre	*	0.0462
			Tcf4STOP/+ + vehicle vs. Tcf4STOP/+ + PHP.eB/Cre	ns	0.691
Figure 5 - figure 5 supplement 1	D	Unpaired t-test	Tcf4+/+ vs. Tcf4STOP/+	ns	0.0622
	E (Delta)	Unpaired t-test	Tcf4+/+ vs. Tcf4STOP/+	ns	0.1126
	E (Theta)	Unpaired t-test	Tcf4+/+ vs. Tcf4STOP/+	*	0.034
	E (Beta)	Unpaired t-test	Tcf4+/+ vs. Tcf4STOP/+	ns	0.1195
	E (Gamma)	Unpaired t-test	Tcf4+/+ vs. Tcf4STOP/+	ns	0.0996
Figure 6	F (Tcf4)	Ordinary One-Way ANOVA followed by Bonferroni’s post hoc	Tcf4+/+ + vehicle vs. Tcf4STOP/+ + vehicle	****	<0.0001
			Tcf4+/+ + vehicle vs. Tcf4STOP/+ + PHP.eB/Cre	***	0.0002
			Tcf4STOP/+ + vehicle vs. Tcf4STOP/+ + PHP.eB/Cre	***	0.0004
	F (Grin2a)		Tcf4+/+ + vehicle vs. Tcf4STOP/+ + vehicle	****	<0.0001
			Tcf4+/+ + vehicle vs. Tcf4STOP/+ + PHP.eB/Cre	ns	0.0723
			Tcf4STOP/+ + vehicle vs. Tcf4STOP/+ + PHP.eB/Cre	**	0.009
	F (Mal)		Tcf4+/+ + vehicle vs. Tcf4STOP/+ + vehicle	****	<0.0001
			Tcf4+/+ + vehicle vs. Tcf4STOP/+ + PHP.eB/Cre	*	0.0115
			Tcf4STOP/+ + vehicle vs. Tcf4STOP/+ + PHP.eB/Cre	*	0.0271
	F (Glra3)		Tcf4+/+ + vehicle vs. Tcf4STOP/+ + vehicle	**	0.0015
			Tcf4+/+ + vehicle vs. Tcf4STOP/+ + PHP.eB/Cre	ns	0.4186
			Tcf4STOP/+ + vehicle vs. Tcf4STOP/+ + PHP.eB/Cre	ns	0.064
	F (Lpar1)		Tcf4+/+ + vehicle vs. Tcf4STOP/+ + vehicle	****	<0.0001
			Tcf4+/+ + vehicle vs. Tcf4STOP/+ + PHP.eB/Cre	*	0.0285
			Tcf4STOP/+ + vehicle vs. Tcf4STOP/+ + PHP.eB/Cre	ns	0.0747
